# Supplementary material for: A comparison study of succinct data structures for use in GWAS
Source: Springer Nature journal article supplement (doi:10.1186/1471-2105-14-369), 2013-12-01
Supplement: 12859_2013_6235_MOESM1_ESM.pdf [file 12859_2013_6235_MOESM1_ESM.pdf]

## Constructing a frequency table from 2-bit encoded genotypes

---

$AA \leftarrow 0$

$Aa \leftarrow 0$

$aa \leftarrow 0$

**for**  $i = 0 \rightarrow N$  **do**

$x \leftarrow A[i]$

$y \leftarrow B[i]$

$aa \leftarrow aa + \text{popcount}(x \wedge y)$

$Aa \leftarrow Aa + \text{popcount}(y)$

$AA \leftarrow AA + \text{popcount}(x)$

**end for**

$AA \leftarrow AA - aa$

$Aa \leftarrow Aa - aa$

▷  $N$  is the number of blocks per bit vector

▷  $A$  is the (AA or aa) genotype bit vector

▷  $B$  is the (Aa or aa) genotype bit vector
