# Supplementary material for: A comparison study of succinct data structures for use in GWAS
Source: Springer Nature journal article supplement (doi:10.1186/1471-2105-14-369), 2013-12-01
Supplement: 12859_2013_6235_MOESM2_ESM.pdf [file 12859_2013_6235_MOESM2_ESM.pdf]

## Constructing a contingency table from 2-bit encoded genotypes

---

$contin \leftarrow \{0, 0, 0, 0, 0, 0, 0, 0, 0, 0\}$

**for**  $i = 0 \rightarrow N$  **do**

▷  $N$  is the number of blocks per bit vector

$M1[0] \leftarrow A[i]$

▷ Read bit blocks for Marker 1

$M1[1] \leftarrow B[i]$

$M2[0] \leftarrow C[i]$

▷ Read bit blocks for Marker 2

$M2[1] \leftarrow D[i]$

$M1[2] \leftarrow M1[0] \wedge M1[1]$

$M2[2] \leftarrow M2[0] \wedge M2[1]$

**for**  $j = 0 \rightarrow 2$  **do**

$M1[j] \leftarrow M1[j] \oplus M1[2]$

$M2[j] \leftarrow M2[j] \oplus M2[2]$

**end for**

**for**  $j = 0 \rightarrow 3$  **do**

**for**  $k = 0 \rightarrow 3$  **do**

$contin[j * 3 + k] \leftarrow contin[j * 3 + k] + \text{popcount}(M1[j] \wedge M2[k])$

**end for**

**end for**

**end for**

---
