# Supplementary material for: A comparison study of succinct data structures for use in GWAS
Source: Springer Nature journal article supplement (doi:10.1186/1471-2105-14-369), 2013-12-01

# Case-Control Contingency Table

Average build time for 10000 Variants following Affy6 genotype distribution

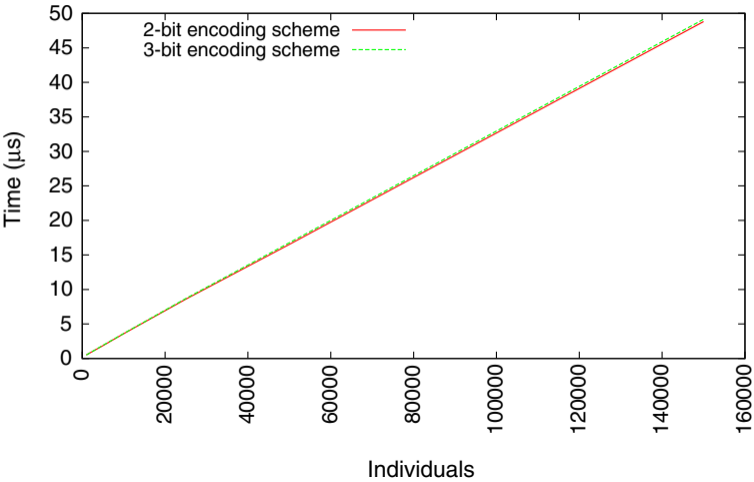

Supplement: 12859_2013_6235_MOESM4_ESM.pdf [file 12859_2013_6235_MOESM4_ESM.pdf]
